# Supplementary material for: Genetic screening for modifiers of the DREF pathway in Drosophila melanogaster: identification and characterization of HP6 as a novel target of DREF
Source: PubMed Central journal article supplement — Nucleic Acids Res. 2009 Jan 9;37(5):1423–37. doi: 10.1093/nar/gkn1068 (PMC2655671; doi:10.1093/nar/gkn1068), 2009-01-09
Supplement: gkn1068_1.pdf [file gkn1068_1.pdf]

Supplementary Table 1. List of fly lines tested for modifier screening of the DREF-induced rough eye phenotype

| <i>Allele(s) tested</i>                                        | Cytological location      | <i>gene</i>          | CG number        | Type of allele      | Effect on Rough eye Phenotype |
|----------------------------------------------------------------|---------------------------|----------------------|------------------|---------------------|-------------------------------|
| <b><i>Df(1)sqh</i></b>                                         | <b>5D1-5D2; 5E</b>        |                      |                  | <b>Deficiency</b>   | <b>Suppression</b>            |
| <i>Act5C</i> <sup>G0117</sup>                                  | 5C7                       | <i>Act5C</i>         | CG4027           | P element insertion | N.D.                          |
| <i>Mipp2</i> <sup>G0303</sup>                                  | 5D4                       | <i>Mipp2</i>         | CG4317           | P element insertion | N.D.                          |
| <i>Lag1</i> <sup>G0365</sup>                                   | 5E4                       | <i>Lag1</i>          | CG3576           | P element insertion | Suppression                   |
| <i>Lag1</i> <sup>G0489</sup>                                   | 5E4                       | <i>Lag1</i>          | CG3576           | P element insertion | N.D.                          |
| <i>l(1)G0287</i> <sup>G0287</sup>                              | 5E4                       | <i>Ubi-p5E</i>       | CG32744          | P element insertion | Suppression                   |
| <b><i>Df(1)C128</i></b>                                        | <b>7D1; 7D5-7D6</b>       |                      |                  | <b>Deficiency</b>   | <b>Enhancement</b>            |
| <i>Tom40</i> <sup>G0216</sup>                                  | 7B7                       | <i>Tom40</i>         | CG12157          | P element insertion | Enhancement                   |
| <i>l(1)G0155</i> <sup>G0155</sup>                              | 7C3                       | <i>l(1)G0155</i>     | CG1515           | P element insertion | Enhancement                   |
| <i>l(1)G0459</i> <sup>G0459</sup>                              | 7D                        | <i>l(1)G0459</i>     |                  | P element insertion | N.D.                          |
| <i>fs(1)h</i> <sup>G0093</sup>                                 | 7D4                       | <i>fs(1)h</i>        | CG2252           | P element insertion | Enhancement                   |
| <i>mys</i> <sup>KG02930</sup>                                  | 7D5                       | <i>mys</i>           | CG1560           | P element insertion | Enhancement                   |
| <i>mys</i> <sup>G0281</sup>                                    | 7D5                       | <i>mys</i>           | CG1560           | P element insertion | Enhancement                   |
| <i>mys</i> <sup>G0091b</sup>                                   | 7D5                       | <i>mys</i>           | CG1560           | P element insertion | N.D.                          |
| <i>mys</i> <sup>G0233</sup>                                    | 7D5                       | <i>mys</i>           | CG1560           | P element insertion | N.D.                          |
| <i>Smox</i> <sup>G0348</sup>                                   | 7D15                      | <i>Smox</i>          | CG2262           | P element insertion | N.D.                          |
| <i>Trxr-1</i> <sup>G0154</sup>                                 | 7D22                      | <i>Trxr-1</i>        | CG2151           | P element insertion | N.D.                          |
| <i>Trxr-1</i> <sup>G0379</sup>                                 | 7D22                      | <i>Trxr-1</i>        | CG2151           | P element insertion | N.D.                          |
| <i>Trxr-1</i> <sup>G0477</sup>                                 | 7D22                      | <i>Trxr-1</i>        | CG2151           | P element insertion | N.D.                          |
| <i>Trxr-1</i> <sup>G0481</sup>                                 | 7D22                      | <i>Trxr-1</i>        | CG2151           | hypomorph           | N.D.                          |
| <i>l(1)G0219</i> <sup>G0219</sup>                              | 7E7                       | <i>CG32711, Trf2</i> | CG32711, CG18009 | P element insertion | Enhancement                   |
| <i>l(1)G0228</i> <sup>G0228</sup>                              | 7E7                       | <i>CG32711, Trf2</i> | CG32711, CG18009 | P element insertion | Enhancement                   |
| <i>l(1)G0295</i> <sup>G0295</sup>                              | 7E7                       | <i>CG32711, Trf2</i> | CG32711, CG18009 | P element insertion | Enhancement                   |
| <i>l(1)G0332</i> <sup>G0332</sup>                              | 7E7                       | <i>CG32711, Trf2</i> | CG32711, CG18009 | P element insertion | Enhancement                   |
| <i>l(1)G0372</i> <sup>G0372</sup>                              | 7E7                       | <i>CG32711, Trf2</i> | CG32711, CG18009 | P element insertion | Enhancement                   |
| <i>l(1)G0425</i> <sup>G0425</sup>                              | 7E7                       | <i>CG32711, Trf2</i> | CG32711, CG18009 | P element insertion | Enhancement                   |
| <i>l(1)G0071</i> <sup>G0071</sup>                              | 7E7                       | <i>CG32711, Trf2</i> | CG32711, CG18009 | P element insertion | N.D.                          |
| <i>l(1)G0161</i> <sup>G0161</sup>                              | 7E7                       | <i>CG32711, Trf2</i> | CG32711, CG18009 | P element insertion | N.D.                          |
| <i>l(1)G0203</i> <sup>G0203</sup>                              | 7E7                       | <i>CG32711, Trf2</i> | CG32711, CG18009 | P element insertion | N.D.                          |
| <b><i>Df(1)w-L15</i></b>                                       | <b>9B1-9B2; 10A1-10A2</b> |                      |                  | <b>Deficiency</b>   | <b>Enhancement</b>            |
| <i>l(1)G0197</i> <sup>G0197</sup>                              | 9B                        | <i>l(1)G0197</i>     |                  | P element insertion | N.D.                          |
| <i>l(1)G0289</i> <sup>BG00227</sup>                            | 9B11-9B12                 | <i>l(1)G0289</i>     | CG2221           | P element insertion | Enhancement*                  |
| <i>flw</i> <sup>F0172</sup>                                    | 9B14                      | <i>flw</i>           | CG2096           | P element insertion | N.D.                          |
| <i>l(1)G0419</i> <sup>G0419</sup>                              | 9D3                       | <i>spri</i>          | CG34414          | P element insertion | N.D.                          |
| <i>ras</i> <sup>G0002</sup>                                    | 9E2                       | <i>ras</i>           | CG1799           | P element insertion | N.D.                          |
| <i>ras</i> <sup>G0056</sup>                                    | 9E2                       | <i>ras</i>           | CG1799           | P element insertion | N.D.                          |
| <i>ras</i> <sup>G0051</sup>                                    | 9E2                       | <i>ras</i>           | CG1799           | P element insertion | N.D.                          |
| <i>ras</i> <sup>G00436</sup>                                   | 9E2                       | <i>ras</i>           | CG1799           | P element insertion | N.D.                          |
| <i>ras</i> <sup>G0482</sup>                                    | 9E2                       | <i>ras</i>           | CG1799           | P element insertion | N.D.                          |
| <i>dsh</i> <sup>l</sup>                                        | 10B4-10B5                 | <i>dsh</i>           | CG18361          | hypomorph           | N.D.                          |
| <i>dsh</i> <sup>l</sup>                                        | 10B4-10B5                 | <i>dsh</i>           | CG18361          | Loss of function    | N.D.                          |
| <i>dsh</i> <sup>h</sup>                                        | 10B4-10B5                 | <i>dsh</i>           | CG18361          | Loss of function    | N.D.                          |
| <i>CG15737</i> <sup>G0113c</sup>                               | 10F4                      | <i>CG15737</i>       | CG15737          | P element insertion | N.D.                          |
| <b><i>Df(1)HF368</i></b>                                       | <b>11A2; 11B9</b>         |                      |                  | <b>Deficiency</b>   | <b>Enhancement</b>            |
| <i>Tis11</i> <sup>G0124</sup>                                  | 11B9                      | <i>Tis11</i>         | CG4070           | P element insertion | N.D.                          |
| <i>l(1)G0307b</i> <sup>G0307b</sup>                            | 12F4                      | <i>rut</i>           | CG9533           | P element insertion | N.D.                          |
| <i>mei-41</i> <sup>G0221b</sup>                                | 14C3                      | <i>mei-41</i>        | CG4252           | P element insertion | N.D.                          |
| <b><i>Df(1)16-2-19</i></b>                                     | <b>19A5; 19D3</b>         |                      |                  | <b>Deficiency</b>   | <b>Suppression</b>            |
| <i>dome</i> <sup>G0199b</sup>                                  | 18D13-18E1                | <i>dome</i>          | CG14226          | Loss of function    | Enhancement                   |
| <i>CG9577</i> <sup>KG00994</sup>                               | 19C1                      | <i>CG9577</i>        | CG9577           | P element insertion | Enhancement                   |
| <i>P{SUPor-P}KG05547</i>                                       | 19C1                      | <i>sw</i>            | CG18000          | P element insertion | Suppression                   |
| <i>l(1)G0004</i> <sup>G0004</sup>                              | 19C5-19C6                 | <i>l(1)G0004</i>     | CG11738          | P element insertion | Suppression                   |
| <i>CG1702</i> <sup>EP1525</sup>                                | 19D1                      | <i>CG1702</i>        | CG1702           | P element insertion | Suppression*                  |
| <i>RhoGAP19D</i> <sup>BG01005</sup>                            | 19D1-19D2                 | <i>RhoGAP19D</i>     | CG1412           | P element insertion | Enhancement*                  |
| <i>l(1)G0196</i> <sup>G0196</sup>                              | 20C1                      | <i>l(1)G0196</i>     | CG14616          | P element insertion | Enhancement                   |
| <b><i>Df(2L)net-PMF</i></b>                                    | <b>21A1; 21B7-8</b>       |                      |                  | <b>Deficiency</b>   | <b>Enhancement</b>            |
| <i>fs(2)neo4</i> <sup>l</sup>                                  | 21B                       | <i>fs(2)neo4</i>     |                  | P element insertion | N.D.                          |
| <i>kis</i> <sup>h11324</sup>                                   | 21B5                      | <i>kis</i>           | CG3696           | P element insertion | N.D.                          |
| <i>U2af38</i> <sup>h06751</sup>                                | 21B8                      | <i>U2af38</i>        | CG3582           | P element insertion | N.D.                          |
| <i>U2af38</i> <sup>h14504</sup> , <i>Hop</i> <sup>h14504</sup> | 21B8                      | <i>U2af38, Hop</i>   | CG3582, CG2720   | P element insertion | N.D.                          |
| <i>Hop</i> <sup>h00616</sup>                                   | 21B8                      | <i>Hop</i>           | CG2720           | P element insertion | N.D.                          |
| <b><i>Df(2L)al</i></b>                                         | <b>21B8-C1; 21C8-21D1</b> |                      |                  | <b>Deficiency</b>   | <b>Suppression</b>            |
| <i>P{πM}21C</i>                                                | 21C                       |                      |                  | P element insertion | N.D.                          |
| <i>fs(2)ry11</i> <sup>l</sup>                                  | 21C                       | <i>fs(2)ry11</i>     |                  | P element insertion | N.D.                          |
| <i>fs(2)ry6</i> <sup>l</sup>                                   | 21C                       | <i>fs(2)ry6</i>      |                  | P element insertion | N.D.                          |
| <i>α-Adaptin</i> <sup>h0694</sup>                              | 21C2                      | <i>α-Adaptin</i>     | CG4260           | P element insertion | N.D.                          |
| <i>Rp1135</i> <sup>h16513</sup>                                | 21C2                      | <i>Rp1135</i>        | CG4033           | P element insertion | N.D.                          |
| <i>ebi</i> <sup>h16213</sup>                                   | 21C2                      | <i>ebi</i>           | CG4063           | P element insertion | N.D.                          |

| <i>Allele(s) tested</i>                                          | Cytological location        | <i>gene</i>                  | CG number        | Type of allele      | Effect on rough eye phenotype |
|------------------------------------------------------------------|-----------------------------|------------------------------|------------------|---------------------|-------------------------------|
| <i>l(2)k06506</i> <sup>106506</sup>                              | 21C2                        | <i>ex</i>                    | CG4114           | P element insertion | Suppression                   |
| <i>l(2)k07308</i> <sup>107308</sup>                              | 21C2                        | <i>ex</i>                    | CG4114           | P element insertion | Suppression                   |
| <i>ex</i> <sup>12913</sup>                                       | 21C2                        | <i>ex</i>                    | CG4114           | P element insertion | N.D.                          |
| <i>l(2)k07005</i> <sup>107005</sup>                              | 21C2                        | <i>ex</i>                    | CG4114           | P element insertion | N.D.                          |
| <i>l(2)k08915</i> <sup>108915</sup>                              | 21D1                        | <i>cbt</i>                   | CG4427           | P element insertion | Enhancement                   |
| <i>cb</i> <sup>BG02687</sup>                                     | 21D1                        | <i>cbt</i>                   | CG4427           | P element insertion | Enhancement*                  |
| <b>Df(2L)S3</b>                                                  | <b>21D2-21D3; 21F2-22A1</b> |                              |                  | <b>Deficiency</b>   | <b>Suppression</b>            |
| <i>l(2)k09610</i> <sup>109610</sup>                              | 21D2                        | <i>l(2)k09610</i>            |                  | P element insertion | N.D.                          |
| <i>l(2)01855</i> <sup>01855</sup>                                | 21E2                        | <i>ds</i>                    | CG17941          | P element insertion | Enhancement                   |
| <i>ds</i> <sup>05142</sup>                                       | 21E2                        | <i>ds</i>                    | CG17941          | P element insertion | N.D.                          |
| <i>lwr</i> <sup>105486</sup>                                     | 21E2                        | <i>lwr</i>                   | CG3018           | hypomorph           | N.D.                          |
| <i>Gsc</i> <sup>05541</sup>                                      | 21E2                        | <i>Gsc</i>                   | CG2851           | P element insertion | N.D.                          |
| <i>Nle</i> <sup>k13714</sup> , <i>CG2807</i> <sup>k13714</sup>   | 21E2                        | <i>Nle</i> , <i>CG2807</i>   | CG2863, CG2807   | P element insertion | N.D.                          |
| <i>Hsp60</i> <sup>B06619</sup>                                   | 21E2                        | <i>Hsp60B</i>                | CG2830           | P element insertion | N.D.                          |
| <i>drongo</i> <sup>BG01320</sup>                                 | 21E2                        | <i>drongo</i>                | CG3365           | P element insertion | N.D.                          |
| <i>dock</i> <sup>04723</sup>                                     | 21E2                        | <i>dock</i>                  | CG3727           | P element insertion | N.D.                          |
| <i>dock</i> <sup>k13421</sup>                                    | 21E2                        | <i>dock</i>                  | CG3727           | P element insertion | N.D.                          |
| <i>dbe</i> <sup>k05428</sup>                                     | 21E2                        | <i>dbe</i>                   | CG4258           | P element insertion | N.D.                          |
| <i>dbe</i> <sup>BG01742</sup>                                    | 21E2                        | <i>dbe</i>                   | CG4258           | P element insertion | Strong suppression*           |
| <i>S</i> <sup>S109530</sup>                                      | 21E4                        | <i>S</i>                     | CG4385           | P element insertion | Enhancement                   |
| <i>capt</i> <sup>06955</sup>                                     | 21F1                        | <i>capt</i>                  | CG33979          | P element insertion | N.D.                          |
| <i>capt</i> <sup>001217</sup>                                    | 21F1                        | <i>capt</i>                  | CG33979          | P element insertion | N.D.                          |
| <i>capt</i> <sup>001217</sup> , <i>Tango14</i> <sup>000619</sup> | 21F1                        | <i>capt</i> , <i>Tango14</i> | CG33979, CG4775  | P element insertion | N.D.                          |
| <i>l(2)10685</i> <sup>10685</sup>                                | 21F1                        | <i>l(2)10685</i>             | CG4749           | P element insertion | N.D.                          |
| <i>l(2)10685</i> <sup>05810</sup>                                | 21F1-2                      |                              |                  | P element insertion | Suppression                   |
| <b>Df(2L)cl-h3</b>                                               | <b>25D2-25D4; 26B2-26B5</b> |                              |                  | <b>Deficiency</b>   | <b>Suppression</b>            |
| <i>tkv</i> <sup>k16713</sup>                                     | 25D1                        | <i>tkv</i>                   | CG14026          | hypomorph           | N.D.                          |
| <i>Lam</i> <sup>04643</sup>                                      | 25E6                        | <i>Lam</i>                   | CG6944           | Loss of function    | N.D.                          |
| <i>P{GT1}BG01837</i>                                             | 25E6                        | <i>CG14017</i>               | CG14017          | P element insertion | N.D.                          |
| <i>CG917</i> <sup>BG02425</sup>                                  | 25F5                        | <i>CG9171</i>                | CG9171           | P element insertion | N.D.                          |
| <i>chic</i> <sup>11</sup>                                        | 26A5-26B2                   | <i>chic</i>                  | CG9553           | P element insertion | N.D.                          |
| <i>chic</i> <sup>k13321</sup>                                    | 26A6                        | <i>chic</i>                  | CG9553           | P element insertion | N.D.                          |
| <i>lid</i> <sup>106801</sup>                                     | 26B2                        | <i>lid</i>                   | CG9088           | P element insertion | Mild suppression              |
| <i>lid</i> <sup>10424</sup>                                      | 26B2                        | <i>lid</i>                   | CG9088           | P element insertion | N.D.                          |
| <i>eIF-4a</i> <sup>011501</sup>                                  | 26B2                        | <i>eIF-4a</i>                | CG9075           | P element insertion | Suppression                   |
| <i>eIF-4a</i> <sup>012439</sup>                                  | 26B2                        | <i>eIF-4a</i>                | CG9075           | P element insertion | Strong suppression            |
| <i>ifc</i> <sup>4</sup>                                          | 26B2                        | <i>ifc</i>                   | CG9078           | P element insertion | N.D.                          |
| <i>l(2)k06107</i> <sup>06107</sup>                               | 26D1-26D2                   | <i>l(2)k06107</i>            |                  | P element insertion | Enhancement                   |
| <b>Df(2L)Prl</b>                                                 | <b>32F1-32F3; 33F1-33F2</b> |                              |                  | <b>Deficiency</b>   | <b>Enhancement</b>            |
| <i>salm</i> <sup>03602</sup>                                     | 32F2                        | <i>salm</i>                  | CG6464           | hypomorph           | N.D.                          |
| <i>CG31705</i> <sup>BG01777</sup>                                | 32F2                        | <i>CG31705</i>               | CG31705          | P element insertion | N.D.                          |
| <i>P{GT1}BG00617</i>                                             | 32F3                        |                              |                  | P element insertion | N.D.                          |
| <i>crol</i> <sup>04418</sup>                                     | 33A1                        | <i>crol</i>                  | CG14938          | P element insertion | N.D.                          |
| <i>crol</i> <sup>05205</sup>                                     | 33A1-33A2                   | <i>crol</i>                  | CG14938          | P element insertion | Mild suppression              |
| <i>l(2)08307a</i> <sup>08307a</sup>                              | 33A3-33A7                   | <i>l(2)08307a</i>            |                  | P element insertion | N.D.                          |
| <i>P{GT1}BG00011</i>                                             | 33B2                        |                              |                  | P element insertion | N.D.                          |
| <i>P{GT1}BG01539</i>                                             | 33B7                        | <i>Rh5</i>                   | CG5279           | P element insertion | N.D.                          |
| <i>l(2)01810</i> <sup>01810</sup>                                | 33B9                        | <i>l(2)01810</i>             | CG5304           | P element insertion | N.D.                          |
| <i>Aats-thr</i> <sup>04203</sup>                                 | 33C4                        | <i>Aats-thr</i>              | CG5353           | P element insertion | N.D.                          |
| <i>Rab6</i> <sup>08323</sup>                                     | 33C4                        | <i>Rab6</i>                  | CG6601           | P element insertion | N.D.                          |
| <i>aret</i> <sup>01284</sup> , <i>CG31759</i> <sup>01284</sup>   | 33D3                        | <i>aret</i> , <i>CG31759</i> | CG31762, CG31759 | P element insertion | N.D.                          |
| <i>aret</i> <sup>BG00614</sup>                                   | 33D4                        | <i>aret</i>                  | CG31762          | P element insertion | N.D.                          |
| <i>Elf</i> <sup>06909</sup>                                      | 33E4                        | <i>Elf</i>                   | CG6382           | P element insertion | N.D.                          |
| <i>bun</i> <sup>00255</sup>                                      | 33E5-33E9                   | <i>bun</i>                   | CG42281          | P element insertion | N.D.                          |
| <i>bun</i> <sup>BG01623</sup>                                    | 33E7-33E9                   | <i>bun</i>                   | CG42281          | P element insertion | Mild suppression*             |
| <i>l(2)k05448</i> <sup>05448</sup>                               | 33F3                        | <i>CG5776</i> , <i>spict</i> | CG5776, CG12292  | P element insertion | Suppression                   |
| <i>rk</i> <sup>11P</sup>                                         | 34E6                        | <i>rk</i>                    | CG8930           | P element insertion | N.D.                          |
| <i>nimC3</i> <sup>000811</sup>                                   | 34F1                        | <i>nimC3</i>                 | CG16880          | P element insertion | N.D.                          |
| <i>P{GT1}BG02182</i>                                             | 35A2                        | <i>smi35A</i>                | CG4551           | P element insertion | N.D.                          |
| <i>wb</i> <sup>09437</sup>                                       | 35A3-35A4                   | <i>wb</i>                    | CG15288          | P element insertion | N.D.                          |
| <i>wb</i> <sup>BG02232</sup>                                     | 35A3                        | <i>wb</i> , <i>CG32971</i>   | CG15288, CG32971 | P element insertion | N.D.                          |
| <i>Rab14</i> <sup>BG01134</sup>                                  | 35A4                        | <i>Rab14</i>                 | CG4212           | P element insertion | N.D.                          |
| <i>Adh</i> <sup>BG01049</sup> , <i>Adhr</i> <sup>BG01049</sup>   | 35B3                        | <i>Adh</i> , <i>Adhr</i>     | CG3481, CG3484   | P element insertion | N.D.                          |
| <i>osp</i> <sup>2571</sup>                                       | 35B4                        | <i>osp</i>                   | CG3479           | P element insertion | N.D.                          |
| <i>l(2)35Bc</i> <sup>108808</sup>                                | 35B6-35B10                  | <i>l(2)35Bc</i>              |                  | P element insertion | N.D.                          |
| <i>mol</i> <sup>k115246</sup>                                    | 35B8                        | <i>mol</i>                   | CG4482           | P element insertion | N.D.                          |
| <i>Su(H)</i> <sup>07904</sup>                                    | 35B8                        | <i>Su(H)</i>                 | CG3497           | P element insertion | N.D.                          |
| <i>Su(H)</i> <sup>128</sup>                                      | 35B8                        | <i>Su(H)</i>                 | CG3497           | P element insertion | N.D.                          |
| <i>l(2)35Bg</i> <sup>k10011</sup>                                | 35B8                        | <i>l(2)35Bg</i>              | CG4180           | P element insertion | N.D.                          |
| <i>l(2)35Bd</i> <sup>110408</sup>                                | 35B8                        | <i>l(2)35Bd</i>              | CG3688           | P element insertion | N.D.                          |

| <i>Allele(s) tested</i>                                       | Cytological location         | <i>gene</i>           | CG number        | Type of allele      | Effect on rough eye phenotype |
|---------------------------------------------------------------|------------------------------|-----------------------|------------------|---------------------|-------------------------------|
| <i>ck</i> <sup>07130</sup>                                    | 35B9                         | <i>ck</i>             | CG7595           | P element insertion | N.D.                          |
| <i>CG15269</i> <sup>05441</sup> , <i>stc</i> <sup>05441</sup> | 35C2                         | <i>CG15269, stc</i>   | CG15269, CG3647  | Loss of function    | N.D.                          |
| <b><i>Df(2L)TW116(R)GW2</i></b>                               | <b>35D1; 35D4</b>            |                       |                  | <b>Deficiency</b>   | <b>Suppression</b>            |
| <i>gft</i> <sup>06430</sup>                                   | 35D1                         | <i>gft</i>            | CG11861          | Loss of function    | Mild suppression              |
| <i>ms(2)35C1</i> <sup>02316</sup>                             | 35D1                         | <i>ms(2)35Ci</i>      | CG31733          | P element insertion | N.D.                          |
| <i>P{lacW}k09017</i>                                          | 35D1-35D2                    |                       |                  | P element insertion | N.D.                          |
| <b><i>Df(2L)TW116(R)GW13</i></b>                              | <b>35D2; 35F1-2</b>          |                       |                  | <b>Deficiency</b>   | <b>Suppression</b>            |
| <b><i>Df(2L)b83d29a</i></b>                                   | <b>35D2-35D4; 35E2-35E6</b>  |                       |                  | <b>Deficiency</b>   | <b>Enhancement</b>            |
| <i>lace</i> <sup>05585</sup>                                  | 35D2                         | <i>lace</i>           | CG4162           | P element insertion | Mild suppression              |
| <i>esg</i> <sup>R7-2.22</sup>                                 | 35D2                         | <i>esg</i>            | CG3758           | P element insertion | N.D.                          |
| <i>esg</i> <sup>09066</sup>                                   | 35D2                         | <i>esg</i>            | CG3758           | P element insertion | N.D.                          |
| <i>CycE</i> <sup>05206</sup>                                  | 35D4                         | <i>CycE</i>           | CG3938           | hypomorph           | N.D.                          |
| <i>CycE</i> <sup>005007</sup>                                 | 35D4                         | <i>CycE</i>           | CG3938           | hypomorph           | N.D.                          |
| <i>l(2)35Di</i> <sup>BG02008</sup>                            | 35D4                         | <i>l(2)35Di</i>       | CG13240          | P element insertion | N.D.                          |
| <i>l(2)35Df</i>                                               | 35D4                         | <i>l(2)35Df</i>       | CG4152           | P element insertion | N.D.                          |
| <i>P{ArB}A507.2M2</i>                                         | 35D-35E                      |                       |                  | P element insertion | N.D.                          |
| <i>P{GT1}BG01884</i>                                          | 35E1                         |                       |                  | P element insertion | N.D.                          |
| <i>P{lacW}J29</i>                                             | 35E1-35E2                    |                       |                  | P element insertion | Suppression                   |
| <i>BicC</i> <sup>BG00092</sup>                                | 35E2                         | <i>BicC</i>           | CG4824           | P element insertion | Suppression*                  |
| <b><i>Df(2L)H20</i></b>                                       | <b>36A8-36A9; 36E1-36E2</b>  |                       |                  | <b>Deficiency</b>   | <b>Enhancement</b>            |
| <i>grp</i> <sup>06034</sup>                                   | 36A10                        | <i>grp</i>            | CG17161          | P element insertion | N.D.                          |
| <i>P{lacW}k15102</i> <sup>k15102</sup>                        | 36A10                        |                       |                  | P element insertion | N.D.                          |
| <i>Cyt-c-d</i> <sup>061</sup>                                 | 36A11                        | <i>Cyt-c-d</i>        | CG13263          | Loss of function    | Strong suppression            |
| <i>l(2)k13905</i> <sup>k13905</sup>                           | 36A11                        | <i>l(2)k13905</i>     |                  | P element insertion | N.D.                          |
| <i>glu</i> <sup>00819</sup>                                   | 36A13                        | <i>glu</i>            | CG11397          | Loss of function    | N.D.                          |
| <i>Mhc</i> <sup>010423</sup>                                  | 36B1                         | <i>Mhc</i>            | CG17927          | P element insertion | N.D.                          |
| <i>Cas</i> <sup>003902</sup> , <i>mdy</i> <sup>003902</sup>   | 36B2                         | <i>Cas, mdy</i>       | CG13281, CG31991 | amorph              | N.D.                          |
| <i>P{GT1}BG02607</i>                                          | 36B3                         | <i>CG6115</i>         | CG6115           | P element insertion | N.D.                          |
| <i>dl</i> <sup>010816</sup>                                   | 36C9                         | <i>dl</i>             | CG6667           | P element insertion | N.D.                          |
| <i>Aac1</i> <sup>006710</sup>                                 | 36C9                         | <i>Aac1</i>           | CG6582           | P element insertion | N.D.                          |
| <i>P{GT1}BG01221</i>                                          | 36D3                         |                       |                  | P element insertion | N.D.                          |
| <i>CadN2</i> <sup>BG02611a</sup>                              | 36D3                         | <i>CadN2</i>          | CG7527           | P element insertion | N.D.                          |
| <b><i>Df(2L)TW50</i></b>                                      | <b>36E4-36F1; 38A6-38A7</b>  |                       |                  | <b>Deficiency</b>   | <b>Enhancement</b>            |
| <i>RpS26</i> <sup>04553</sup>                                 | 36F4                         | <i>RpS26</i>          | CG10305          | P element insertion | Suppression                   |
| <b><i>Df(2L)pr-A16</i></b>                                    | <b>37B2-37B12; 38D2-38D5</b> |                       |                  | <b>Deficiency</b>   | <b>Enhancement</b>            |
| <b><i>Df(2L)VA12</i></b>                                      | <b>37C2-37C5; 38B2-38C1</b>  |                       |                  | <b>Deficiency</b>   | <b>Enhancement</b>            |
| <b><i>Df(2L)Sd77</i></b>                                      | <b>37D1-37D2; 38C1-38C2</b>  |                       |                  | <b>Deficiency</b>   | <b>Enhancement</b>            |
| <i>biv</i> <sup>BG01771</sup>                                 | 36E3                         | <i>biv</i>            | CG15148          | P element insertion | N.D.                          |
| <i>Fas3</i> <sup>007109b</sup>                                | 36E3-36E4                    | <i>Fas3</i>           | CG5803           | P element insertion | N.D.                          |
| <i>Fas3</i> <sup>A183.1F2</sup>                               | 36F2                         | <i>Fas3</i>           | CG5803           | amorph              | N.D.                          |
| <i>l(2)37Db</i> <sup>016106</sup>                             | 37B8                         | <i>l(2)37Db</i>       |                  | P element insertion | N.D.                          |
| <i>l(2)37Ad</i> <sup>02660b</sup>                             | 37B8-37B9                    | <i>l(2)37Ad</i>       |                  | P element insertion | N.D.                          |
| <i>RpL30</i> <sup>009918</sup>                                | 37B9                         | <i>RpL30</i>          | CG10652          | P element insertion | N.D.                          |
| <i>RpL30</i> <sup>01265</sup>                                 | 37B9                         | <i>RpL30</i>          | CG10652          | P element insertion | N.D.                          |
| <i>RpL30</i> <sup>003308</sup>                                | 37B9                         | <i>RpL30</i>          | CG10652          | P element insertion | N.D.                          |
| <i>Catsup</i> <sup>005424</sup>                               | 37B11                        | <i>Catsup</i>         | CG10449          | P element insertion | N.D.                          |
| <i>l(2)37Co</i> <sup>1</sup>                                  | 37C                          | <i>l(2)37Co</i>       |                  | P element insertion | N.D.                          |
| <i>brat</i> <sup>BG02721</sup>                                | 37C1                         | <i>brat, l(2)37Cg</i> | CG10719, CG10685 | P element insertion | N.D.                          |
| <i>l(2)37Cb</i> <sup>BG01776</sup>                            | 37C1                         | <i>l(2)37Cb</i>       | CG10689          | P element insertion | N.D.                          |
| <i>Ddc</i> <sup>002104</sup>                                  | 37C1                         | <i>Ddc</i>            | CG10697          | P element insertion | N.D.                          |
| <i>brat</i> <sup>006028</sup>                                 | 37C5                         | <i>brat</i>           | CG10719          | P element insertion | N.D.                          |
| <i>pigeon</i> <sup>P1</sup>                                   | 37C7                         | <i>pigeon</i>         | CG10739          | P element insertion | Enhancement                   |
| <i>BG01228</i> <sup>BG01228</sup>                             | 37D1                         |                       |                  | P element insertion | N.D.                          |
| <i>spt</i> <sup>03547</sup>                                   | 37F2                         | <i>spt</i>            | CG10334          | P element insertion | N.D.                          |
| <i>s(2)neo1<sup>l</sup></i>                                   | 38A                          | <i>fs(2)neo11</i>     |                  | P element insertion | N.D.                          |
| <i>l(2)k10239</i> <sup>010239</sup>                           | 38A7                         | <i>sick</i>           | CG34343          | P element insertion | N.D.                          |
| <i>barr</i> <sup>014014</sup>                                 | 38B2                         | <i>barr</i>           | CG10726          | P element insertion | N.D.                          |
| <i>neb</i> <sup>00552</sup>                                   | 38B4                         | <i>fok, neb</i>       | CG10746, CG10718 | P element insertion | N.D.                          |
| <i>neb</i> <sup>005702</sup>                                  | 38B4                         | <i>neb</i>            | CG10718          | Loss of function    | N.D.                          |
| <i>neb</i> <sup>BG02300</sup>                                 | 38B4                         | <i>neb</i>            | CG10718          | P element insertion | N.D.                          |
| <i>P{lacW}k13108b</i>                                         | 38C1-38C2                    |                       |                  | P element insertion | N.D.                          |
| <i>l(2)k07219</i> <sup>007219</sup>                           | 38C5                         | <i>CG16798</i>        | CG16798          | P element insertion | Suppression                   |
| <i>P{GT1}BG02333</i>                                          | 38D1                         |                       |                  | P element insertion | N.D.                          |
| <i>P{lacW}k02501</i>                                          | 38D1                         |                       |                  | P element insertion | N.D.                          |
| <i>CG2611</i> <sup>BG00938</sup>                              | 38D2                         | <i>CG2611</i>         | CG2611           | P element insertion | N.D.                          |
| <b><i>Df(2R)M41A4</i></b>                                     | <b>41A</b>                   |                       |                  | <b>Deficiency</b>   | <b>Enhancement</b>            |
| <i>P{wAR}41A</i>                                              | 41A                          |                       |                  | P element insertion | N.D.                          |
| <i>l(2)k0801</i> <sup>008011</sup>                            | 42D6                         | <i>l(2)k08011</i>     |                  | P element insertion | N.D.                          |
| <b><i>Df(2R)enX31</i></b>                                     | <b>48A1; 48B5</b>            |                       |                  | <b>Deficiency</b>   | <b>Enhancement</b>            |
| <i>en</i> <sup>Xho25</sup>                                    | 47F17-48A1                   | <i>en</i>             | CG9015           | P element insertion | N.D.                          |

| <i>Allele(s) tested</i>                                         | Cytological location | <i>gene</i>             | CG number        | Type of allele      | Effect on rough eye phenotype |
|-----------------------------------------------------------------|----------------------|-------------------------|------------------|---------------------|-------------------------------|
| <i>rack</i> <sup>K15001</sup>                                   | 48A                  | <i>rack</i>             |                  | P element insertion | N.D.                          |
| <i>Egm</i> <sup>K14708</sup>                                    | 48A3                 | <i>Egm</i>              | CG9006           | Loss of function    | N.D.                          |
| <i>CG9005</i> <sup>BG02278</sup>                                | 48A4                 | <i>CG9005</i>           | CG9005           | P element insertion | N.D.                          |
| <b><i>Df(2R)PC4</i></b>                                         | <b>55A; 55F</b>      |                         |                  | <b>Deficiency</b>   | <b>Suppression</b>            |
| <i>hall</i> <sup>l</sup>                                        | 55A1-55F3            | <i>hall</i>             |                  | P element insertion | N.D.                          |
| <i>stau</i> <sup>99</sup>                                       | 55B7                 | <i>stau</i>             | CG5753           | Loss of function    | Mild suppression              |
| <i>Hsf</i> <sup>#3091</sup>                                     | 55B8                 | <i>Hsf</i>              | CG5748           | Loss of function    | Suppression                   |
| <i>Pcl</i> <sup>1859</sup>                                      | 55B8                 | <i>Pcl</i>              | CG5109           | P element insertion | N.D.                          |
| <i>pAbp</i> <sup>K10109</sup>                                   | 55B8                 | <i>pAbp</i>             | CG5119           | P element insertion | N.D.                          |
| <i>lola</i> <sup>B02512</sup>                                   | 55B9                 | <i>lola</i>             | CG5738           | hypomorph           | N.D.                          |
| <i>Dgp-1</i> <sup>BG00396</sup>                                 | 55B11                | <i>Dgp-1</i>            | CG5729           | P element insertion | N.D.                          |
| <i>fj</i> <sup>911</sup>                                        | 55C1                 | <i>fj</i>               | CG10917          | P element insertion | N.D.                          |
| <i>sbb</i> <sup>H440</sup>                                      | 55C2                 | <i>sbb</i>              | CG5580           | P element insertion | N.D.                          |
| <i>sbb</i> <sup>BG01610</sup>                                   | 55C2                 | <i>sbb</i>              | CG5580           | P element insertion | N.D.                          |
| <i>P{GT1}BG02858</i>                                            | 55C6                 | <i>GstE1</i>            | CG5164           | P element insertion | N.D.                          |
| <i>Dp1</i> <sup>BG01405b</sup> , <i>imd</i> <sup>BG01405b</sup> | 55C8                 | <i>Dp1, imd</i>         | CG5170, CG5576   | P element insertion | N.D.                          |
| <i>Dp1</i> <sup>BG02288</sup> , <i>imd</i> <sup>BG02288</sup>   | 55C8                 | <i>Dp1, imd</i>         | CG5170, CG5576   | P element insertion | N.D.                          |
| <i>l(2)08770</i> <sup>B08770</sup>                              | 55C9                 | <i>CG30118, slim</i>    | CG30118, CG5186  | P element insertion | N.D.                          |
| <i>l(2)08770</i> <sup>B04808</sup>                              | 55C9                 | <i>CG30118, slim</i>    | CG30118, CG5186  | P element insertion | N.D.                          |
| <i>l(2)55Db</i> <sup>425-1</sup>                                | 55D                  | <i>l(2)55Db</i>         |                  | P element insertion | N.D.                          |
| <i>Prp19</i> <sup>B07888</sup>                                  | 55D1-55D2            | <i>Prp19</i>            |                  | P element insertion | N.D.                          |
| <i>P{GT1}BG02569</i>                                            | 55D3                 | <i>Pepck</i>            | CG17725          | P element insertion | N.D.                          |
| <i>Pepck</i> <sup>BG02569</sup>                                 | 55D3                 | <i>Pepck</i>            | CG17725          | P element insertion | Suppression*                  |
| <i>l(2)ry51</i> <sup>1</sup>                                    | 55E                  | <i>l(2)ry51</i>         |                  | P element insertion | N.D.                          |
| <i>edl</i> <sup>B06602</sup>                                    | 55E6                 | <i>edl</i>              | CG15085          | Loss of function    | N.D.                          |
| <i>fs(2)ry12</i> <sup>1</sup>                                   | 55F                  | <i>fs(2)ry12</i>        |                  | P element insertion | N.D.                          |
| <i>l(2)08717</i> <sup>B08717</sup>                              | 55F4                 | <i>l(2)08717</i>        | CG15095          | P element insertion | Suppression                   |
| <i>P{GT1}BG00842</i>                                            | 55F4                 |                         |                  | P element insertion | N.D.                          |
| <i>l(2)03709</i> <sup>B03709</sup>                              | 55F5                 | <i>l(2)03709</i>        |                  | P element insertion | N.D.                          |
| <b><i>Df(2R)Pu-D17</i></b>                                      | <b>57B4; 58B</b>     |                         |                  | <b>Deficiency</b>   | <b>Enhancement</b>            |
| <i>l(2)07806</i> <sup>B07806</sup>                              | 57B5                 | <i>CG34115, CG15649</i> | CG34115, CG15649 | P element insertion | N.D.                          |
| <i>l(2)07206</i> <sup>B07206</sup>                              | 57B13-57B14          | <i>l(2)07206</i>        |                  | P element insertion | N.D.                          |
| <i>P{GT1}BG00201</i>                                            | 57B5                 |                         |                  | P element insertion | N.D.                          |
| <i>l(2)03050</i> <sup>B03050</sup>                              | 57B12                | <i>CG9350</i>           | CG9350           | P element insertion | Suppression                   |
| <i>shg</i> <sup>B03401</sup>                                    | 57B16                | <i>shg</i>              | CG3722           | Loss of function    | N.D.                          |
| <i>P{GT1}BG02636</i>                                            | 57B14                |                         |                  | P element insertion | N.D.                          |
| <i>Xbp1</i> <sup>K13803</sup>                                   | 57C3                 | <i>Xbp1</i>             | G9415            | P element insertion | Suppression                   |
| <i>dom</i> <sup>B08108</sup>                                    | 57D11                | <i>dom</i>              | CG9696           | P element insertion | N.D.                          |
| <i>tmx</i> <sup>1</sup>                                         | 57E1                 | <i>cv-2</i>             | CG15671          | P element insertion | N.D.                          |
| <i>Sdc</i> <sup>B0608</sup>                                     | 57E5                 | <i>Sdc</i>              | CG10497          | P element insertion | N.D.                          |
| <i>Sdc</i> <sup>K10215</sup>                                    | 57E1-57E6            | <i>Sdc</i>              | CG10497          | P element insertion | N.D.                          |
| <i>Fkbp1</i> <sup>B00734</sup>                                  | 57E6                 | <i>Fkbp13</i>           | CG9847           | P element insertion | N.D.                          |
| <i>CG10496</i> <sup>B07128a</sup>                               | 57E8                 | <i>CG10496</i>          | CG10496          | P element insertion | Suppression                   |
| <i>l(2)k10317</i> <sup>B10317</sup>                             | 57E8                 | <i>MESK2, CG10496</i>   | CG15669, CG10496 | P element insertion | N.D.                          |
| <i>MESK2</i> <sup>B00119</sup>                                  | 57E8-57E9            | <i>MESK2</i>            | CG15669          | P element insertion | Suppression                   |
| <i>MESK2</i> <sup>B01467</sup>                                  | 57E8-57E9            | <i>MESK2</i>            | CG15669          | P element insertion | N.D.                          |
| <i>Egfr</i> <sup>B05115</sup>                                   | 57E9-57F1            | <i>Egfr</i>             | CG10079          | P element insertion | N.D.                          |
| <i>l(2)03605</i> <sup>B03605</sup>                              | 57F10                | <i>LBR, Tangol1</i>     | CG17952, CG30404 | P element insertion | N.D.                          |
| <i>HmgD</i> <sup>BG01432</sup>                                  | 57F10                | <i>HmgD</i>             | CG17950          | P element insertion | N.D.                          |
| <i>P{GT1}BG00593</i>                                            | 58A3                 | <i>Fili</i>             | CG34368          | P element insertion | N.D.                          |
| <i>l(2)07837</i> <sup>B07837</sup>                              | 58A3                 | <i>Fili, PpN58A</i>     | CG34368, CG3245  | P element insertion | N.D.                          |

| <i>Allele(s) tested</i>                                         | Cytological location | <i>gene</i>             | CG number        | Type of allele      | Effect on Rough eye Phenotype |
|-----------------------------------------------------------------|----------------------|-------------------------|------------------|---------------------|-------------------------------|
| <i>rack</i> <sup>135001</sup>                                   | 48A                  | <i>rack</i>             |                  | P element insertion | N.D.                          |
| <i>Egm</i> <sup>14708</sup>                                     | 48A3                 | <i>Egm</i>              | CG9006           | Loss of function    | N.D.                          |
| <i>CG9005</i> <sup>BG02278</sup>                                | 48A4                 | <i>CG9005</i>           | CG9005           | P element insertion | N.D.                          |
| <b>Df(2R)PC4</b>                                                | <b>55A; 55F</b>      |                         |                  | <b>Deficiency</b>   | <b>Suppression</b>            |
| <i>hall</i> <sup>1</sup>                                        | 55A1-55F3            | <i>hall</i>             |                  | P element insertion | N.D.                          |
| <i>stat</i> <sup>759</sup>                                      | 55B7                 | <i>stau</i>             | CG5753           | Loss of function    | Mild suppression              |
| <i>Hsf</i> <sup>B03091</sup>                                    | 55B8                 | <i>Hsf</i>              | CG5748           | Loss of function    | Suppression                   |
| <i>Pcl</i> <sup>1859</sup>                                      | 55B8                 | <i>Pcl</i>              | CG5109           | P element insertion | N.D.                          |
| <i>pAbp</i> <sup>10109</sup>                                    | 55B8                 | <i>pAbp</i>             | CG5119           | P element insertion | N.D.                          |
| <i>lolal</i> <sup>102512</sup>                                  | 55B9                 | <i>lolal</i>            | CG5738           | hypomorph           | N.D.                          |
| <i>Dgp-1</i> <sup>BG00396</sup>                                 | 55B11                | <i>Dgp-1</i>            | CG5729           | P element insertion | N.D.                          |
| <i>fj</i> <sup>11</sup>                                         | 55C1                 | <i>fj</i>               | CG10917          | P element insertion | N.D.                          |
| <i>sbb</i> <sup>14440</sup>                                     | 55C2                 | <i>sbb</i>              | CG5580           | P element insertion | N.D.                          |
| <i>sbb</i> <sup>BG01610</sup>                                   | 55C2                 | <i>sbb</i>              | CG5580           | P element insertion | N.D.                          |
| <i>P{GT1}BG02858</i>                                            | 55C6                 | <i>GstE1</i>            | CG5164           | P element insertion | N.D.                          |
| <i>Dp1</i> <sup>BG01405b</sup> , <i>imd</i> <sup>BG01405b</sup> | 55C8                 | <i>Dp1, imd</i>         | CG5170, CG5576   | P element insertion | N.D.                          |
| <i>Dp1</i> <sup>BG02288</sup> , <i>imd</i> <sup>BG02288</sup>   | 55C8                 | <i>Dp1, imd</i>         | CG5170, CG5576   | P element insertion | N.D.                          |
| <i>l(2)08770</i> <sup>08770</sup>                               | 55C9                 | <i>CG30118, slim</i>    | CG30118, CG5186  | P element insertion | N.D.                          |
| <i>l(2)08770</i> <sup>04808</sup>                               | 55C9                 | <i>CG30118, slim</i>    | CG30118, CG5186  | P element insertion | N.D.                          |
| <i>l(2)55Db</i> <sup>425-1</sup>                                | 55D                  | <i>l(2)55Db</i>         |                  | P element insertion | N.D.                          |
| <i>Prp19</i> <sup>07838</sup>                                   | 55D1-55D2            | <i>Prp19</i>            |                  | P element insertion | N.D.                          |
| <i>P{GT1}BG02569</i>                                            | 55D3                 | <i>Pepck</i>            | CG17725          | P element insertion | N.D.                          |
| <i>Pepck</i> <sup>BG02569</sup>                                 | 55D3                 | <i>Pepck</i>            | CG17725          | P element insertion | Suppression*                  |
| <i>l(2)ry51</i> <sup>1</sup>                                    | 55E                  | <i>l(2)ry51</i>         |                  | P element insertion | N.D.                          |
| <i>edl</i> <sup>B06602</sup>                                    | 55E6                 | <i>edl</i>              | CG15085          | Loss of function    | N.D.                          |
| <i>fs(2)ry12</i> <sup>1</sup>                                   | 55F                  | <i>fs(2)ry12</i>        |                  | P element insertion | N.D.                          |
| <i>l(2)08717</i> <sup>08717</sup>                               | 55F4                 | <i>l(2)08717</i>        | CG15095          | P element insertion | Suppression                   |
| <i>P{GT1}BG00842</i>                                            | 55F4                 |                         |                  | P element insertion | N.D.                          |
| <i>l(2)03709</i> <sup>03709</sup>                               | 55F5                 | <i>l(2)03709</i>        |                  | P element insertion | N.D.                          |
| <b>Df(2R)Pu-D17</b>                                             | <b>57B4; 58B</b>     |                         |                  | <b>Deficiency</b>   | <b>Enhancement</b>            |
| <i>l(2)07806</i> <sup>07806</sup>                               | 57B5                 | <i>CG34115, CG15649</i> | CG34115, CG15649 | P element insertion | N.D.                          |
| <i>l(2)07206</i> <sup>07206</sup>                               | 57B13-57B14          | <i>l(2)07206</i>        |                  | P element insertion | N.D.                          |
| <i>P{GT1}BG00201</i>                                            | 57B5                 |                         |                  | P element insertion | N.D.                          |
| <i>l(2)03050</i> <sup>03050</sup>                               | 57B12                | <i>CG9350</i>           | CG9350           | P element insertion | Suppression                   |
| <i>shg</i> <sup>103401</sup>                                    | 57B16                | <i>shg</i>              | CG3722           | Loss of function    | N.D.                          |
| <i>P{GT1}BG02636</i>                                            | 57B14                |                         |                  | P element insertion | N.D.                          |
| <i>Xbp1</i> <sup>113803</sup>                                   | 57C3                 | <i>Xbp1</i>             | G9415            | P element insertion | Suppression                   |
| <i>dom</i> <sup>608108</sup>                                    | 57D11                | <i>dom</i>              | CG9696           | P element insertion | N.D.                          |
| <i>tmx</i> <sup>1</sup>                                         | 57E1                 | <i>cv-2</i>             | CG15671          | P element insertion | N.D.                          |
| <i>Sdc</i> <sup>10608</sup>                                     | 57E5                 | <i>Sdc</i>              | CG10497          | P element insertion | N.D.                          |
| <i>Sdc</i> <sup>310215</sup>                                    | 57E1-57E6            | <i>Sdc</i>              | CG10497          | P element insertion | N.D.                          |
| <i>Fkbp13</i> <sup>100734</sup>                                 | 57E6                 | <i>Fkbp13</i>           | CG9847           | P element insertion | N.D.                          |
| <i>CG10496</i> <sup>07128a</sup>                                | 57E8                 | <i>CG10496</i>          | CG10496          | P element insertion | Suppression                   |
| <i>l(2)k10317</i> <sup>10317</sup>                              | 57E8                 | <i>MESK2, CG10496</i>   | CG15669, CG10496 | P element insertion | N.D.                          |
| <i>MESK2</i> <sup>1001119</sup>                                 | 57E8-57E9            | <i>MESK2</i>            | CG15669          | P element insertion | Suppression                   |
| <i>MESK2</i> <sup>101467</sup>                                  | 57E8-57E9            | <i>MESK2</i>            | CG15669          | P element insertion | N.D.                          |
| <i>Egfr</i> <sup>105115</sup>                                   | 57E9-57F1            | <i>Egfr</i>             | CG10079          | P element insertion | N.D.                          |
| <i>l(2)03605</i> <sup>03605</sup>                               | 57F10                | <i>LBR, Tango11</i>     | CG17952, CG30404 | P element insertion | N.D.                          |
| <i>HmgD</i> <sup>BG01432</sup>                                  | 57F10                | <i>HmgD</i>             | CG17950          | P element insertion | N.D.                          |
| <i>P{GT1}BG00593</i>                                            | 58A3                 | <i>Fili</i>             | CG34368          | P element insertion | N.D.                          |
| <i>l(2)07837</i> <sup>07837</sup>                               | 58A3                 | <i>Fili, PpN58A</i>     | CG34368, CG3245  | P element insertion | N.D.                          |

\*P element insertion lines carrying GAL4 or UAS.
