# Supplementary material for: Genetic screening for modifiers of the DREF pathway in Drosophila melanogaster: identification and characterization of HP6 as a novel target of DREF
Source: PubMed Central journal article supplement — Nucleic Acids Res. 2009 Jan 9;37(5):1423–37. doi: 10.1093/nar/gkn1068 (PMC2655671; doi:10.1093/nar/gkn1068), 2009-01-09
Supplement: gkn1068_2.pdf [file gkn1068_2.pdf]

Supplementary Table 2. DRE or DRE-like sequences in 5'-flanking regions of genes that genetically interact with the *DREF* gene.

| Gene           | DRE or DRE-like | Position       |
|----------------|-----------------|----------------|
| <i>HP6</i>     | 5'-TATCGAaA     | -116 to -123   |
|                | 5'-TgTCGATA     | -132 to -139   |
|                | 5'-cATCGAaA     | -154 to -161   |
|                | 5'-aATCGATt     | -1006 to -1013 |
| <i>pigeon</i>  | 5'-TATCGATA     | -373 to -380   |
|                | 5'-TcTCGATc     | -570 to -578   |
| <i>lace</i>    | 5'-cATCGATc     | -50 to -57     |
|                | 5'-TATCGATg     | -1119 to -1126 |
|                | 5'-TcTCGATa     | -1351 to -1358 |
| <i>Xbp1</i>    | 5'-ggTCGATA     | -236 to -243   |
|                | 5'-aATCGATA     | -353 to -360   |
|                | 5'-gATCGAtA     | -1094 to -1101 |
| <i>guftagu</i> | 5'-TATCGATc     | -665 to -672   |
|                | 5'-gcTCGATA     | -712 to -719   |
|                | 5'-TATCGATA     | -1091 to -1098 |
|                | 5'-TATCGATg     | -1108 to -1113 |
