# Supplementary material for: Genetic screening for modifiers of the DREF pathway in Drosophila melanogaster: identification and characterization of HP6 as a novel target of DREF
Source: PubMed Central journal article supplement — Nucleic Acids Res. 2009 Jan 9;37(5):1423–37. doi: 10.1093/nar/gkn1068 (PMC2655671; doi:10.1093/nar/gkn1068), 2009-01-09
Supplement: gkn1068_3.pdf [file gkn1068_3.pdf]

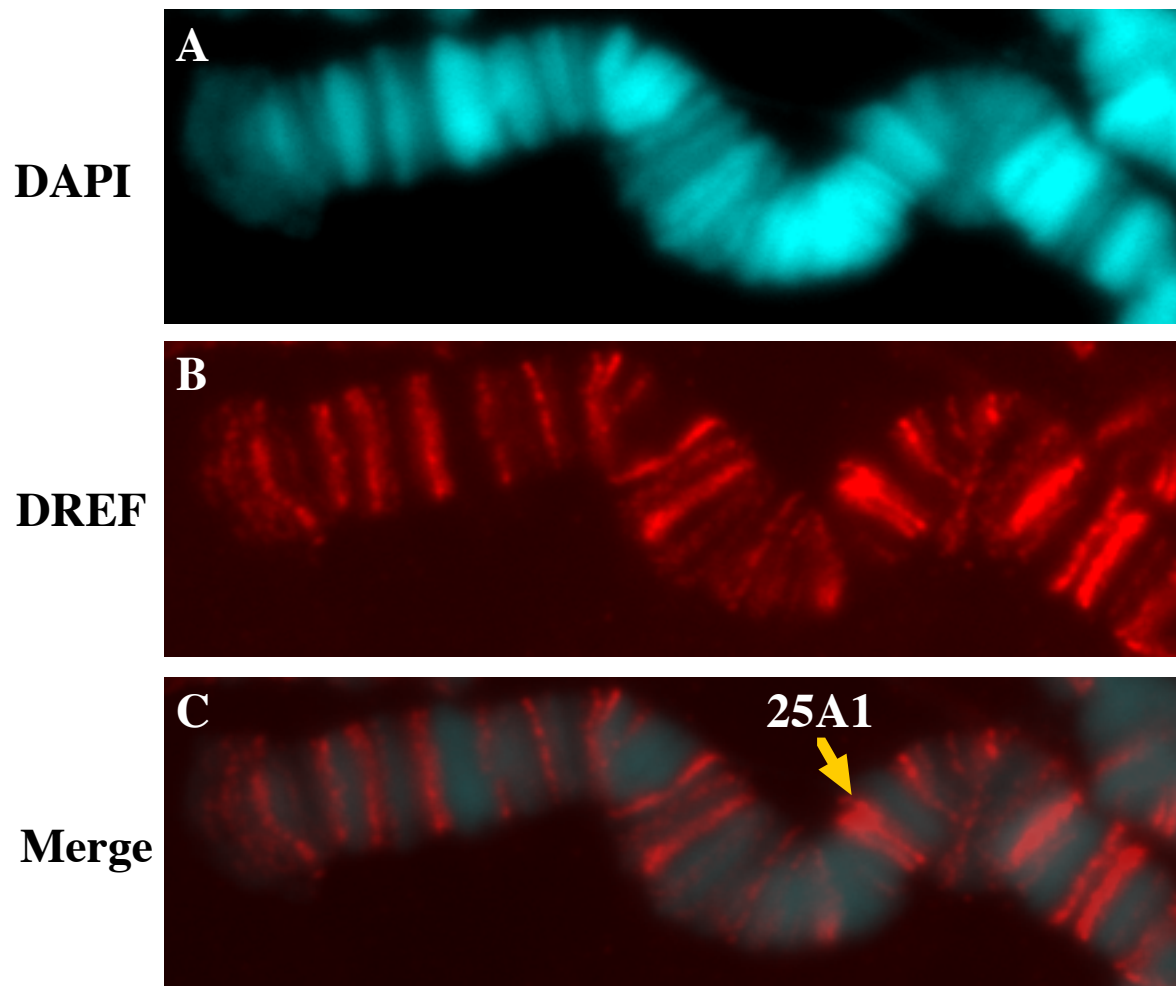

**Supplementary Fig. 1. Immunostaining of salivary gland polytene chromosomes with anti-DREF antibodies.** Chromosomes from third instar larvae of wild-type flies were spread and stained with DAPI (A) and mouse anti-DREF monoclonal antibodies (B) (C) Merged image. The arrow indicates the 25A1 region (second chromosome left arm) where the *HP6* gene is located.
