# Supplementary material for: Genetic screening for modifiers of the DREF pathway in Drosophila melanogaster: identification and characterization of HP6 as a novel target of DREF
Source: PubMed Central journal article supplement — Nucleic Acids Res. 2009 Jan 9;37(5):1423–37. doi: 10.1093/nar/gkn1068 (PMC2655671; doi:10.1093/nar/gkn1068), 2009-01-09
Supplement: gkn1068_4.pdf [file gkn1068_4.pdf]

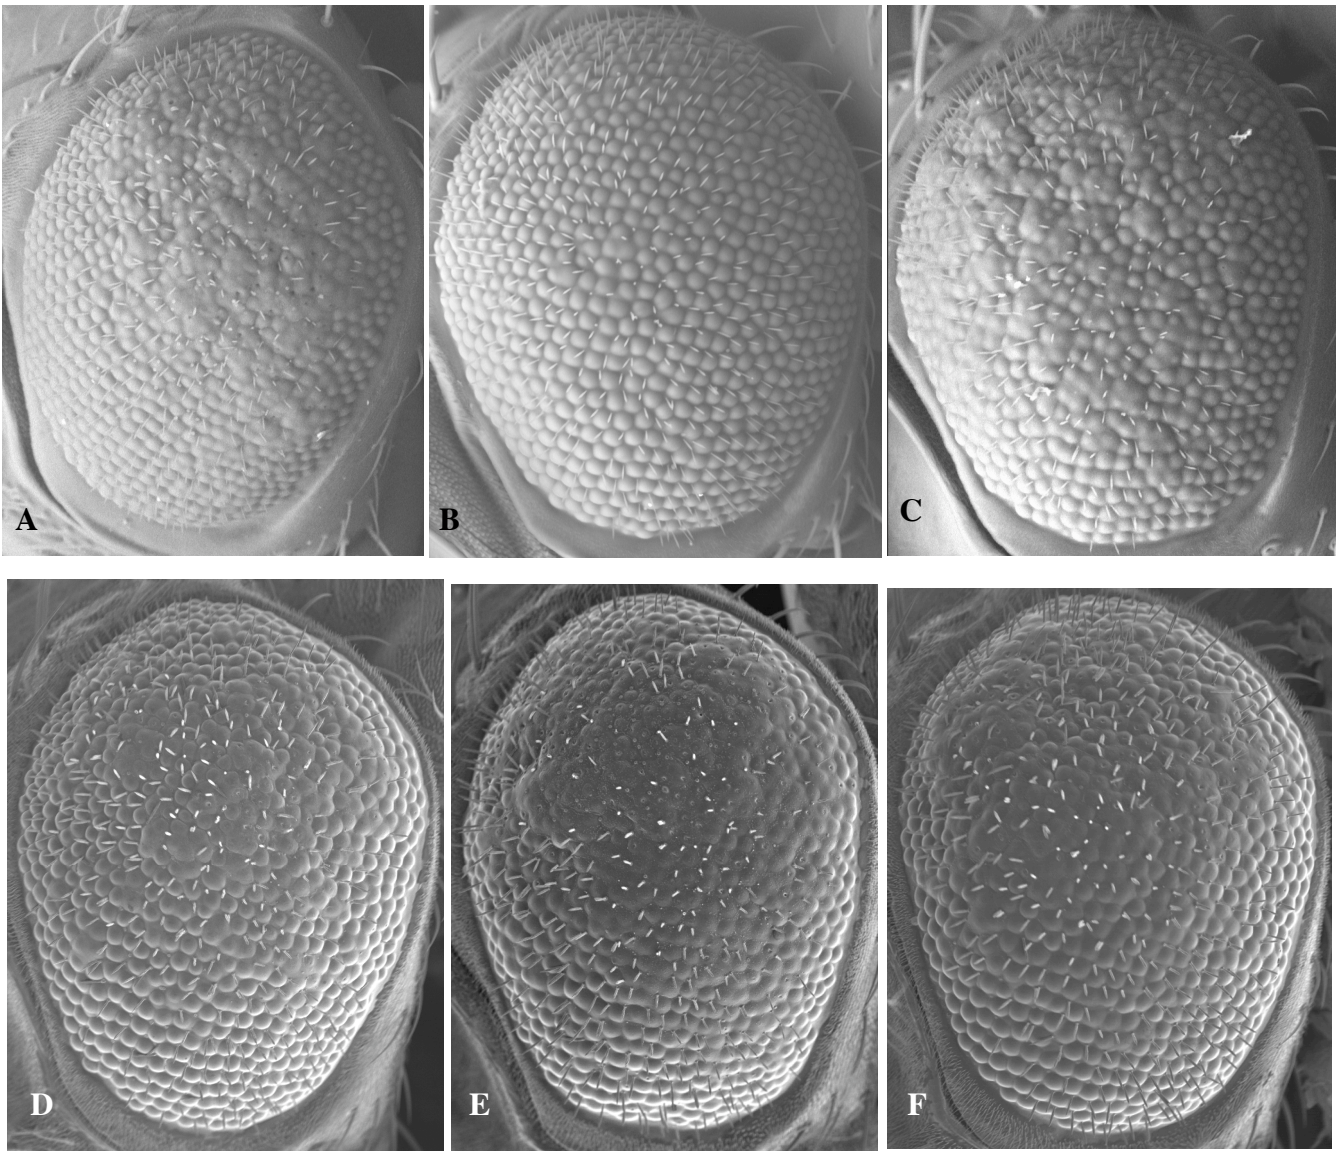

**Supplementary Fig. 2. Scanning electron micrographs of adult compound eyes.** (A, D) *GMR-GAL4/+; UAS-DREF/+*, (B) *GMR-GAL4/+; UAS-DREF/P{w+mGT=GT1}CG15636*, (C) *GMR-GAL4/+; UAS-DREF/CG15636rev*, (E) *GMR-GAL4/+; UAS-DREF/dp<sup>ovr</sup>*, (F) *GMR-GAL4/+; UAS-DREF/dp<sup>D</sup>*. These flies were developed at 28 °C.
